# Supplementary material for: Controllable in situ growth of novel octahedral TiO2 nanoparticles on nickel/titanium alloy fiber substrate for selective solid-phase microextraction of ultraviolet filters in water samples
Source: Royal Society of Chemistry journal article supplement (doi:10.1039/d2ra01031c), 2022-01-01
Supplement: d2ra01031c1.pdf [file d2ra01031c1.pdf]

## Supplementary material

# Controllable in-situ growth of novel octahedral TiO<sub>2</sub> nanoparticles on nickel/titanium alloy fiber substrate for selective solid-phase microextraction of ultraviolet filters in water samples

Junliang Du<sup>a,b</sup>, Juan Li<sup>a</sup>, Rui Lv<sup>a</sup>, Xinzhen Du<sup>b\*</sup>

<sup>a</sup> College of Chemistry and Chemical Engineering, Mianyang Normal University, Mianyang, 621000, China

<sup>b</sup> College of Chemistry and Chemical Engineering, Northwest Normal University, Lanzhou, 730070, China

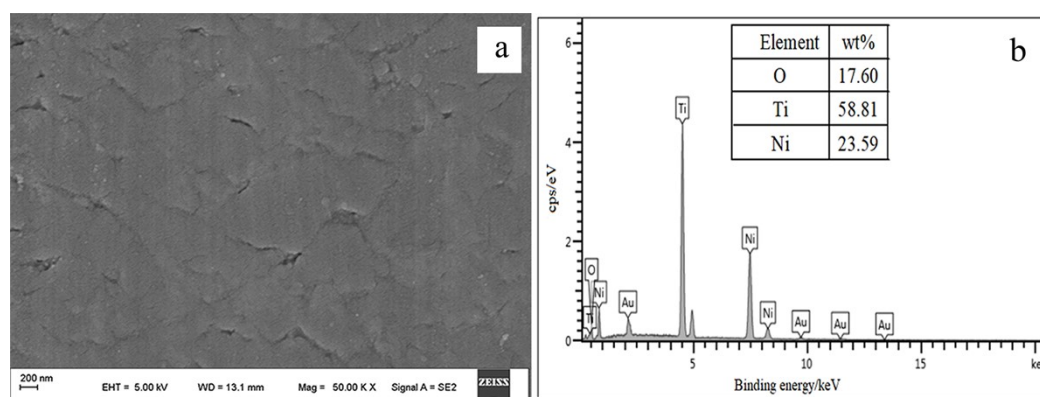

**Fig. S1.** Surface SEM image (a) and EDX spectrum (b) of the bare NiTi wire.

\* Corresponding author at: College of Chemistry and Chemical Engineering, Northwest Normal University, Lanzhou, 730070, China.

E-mail address: fengzhongyundong@163.com (X. Du).

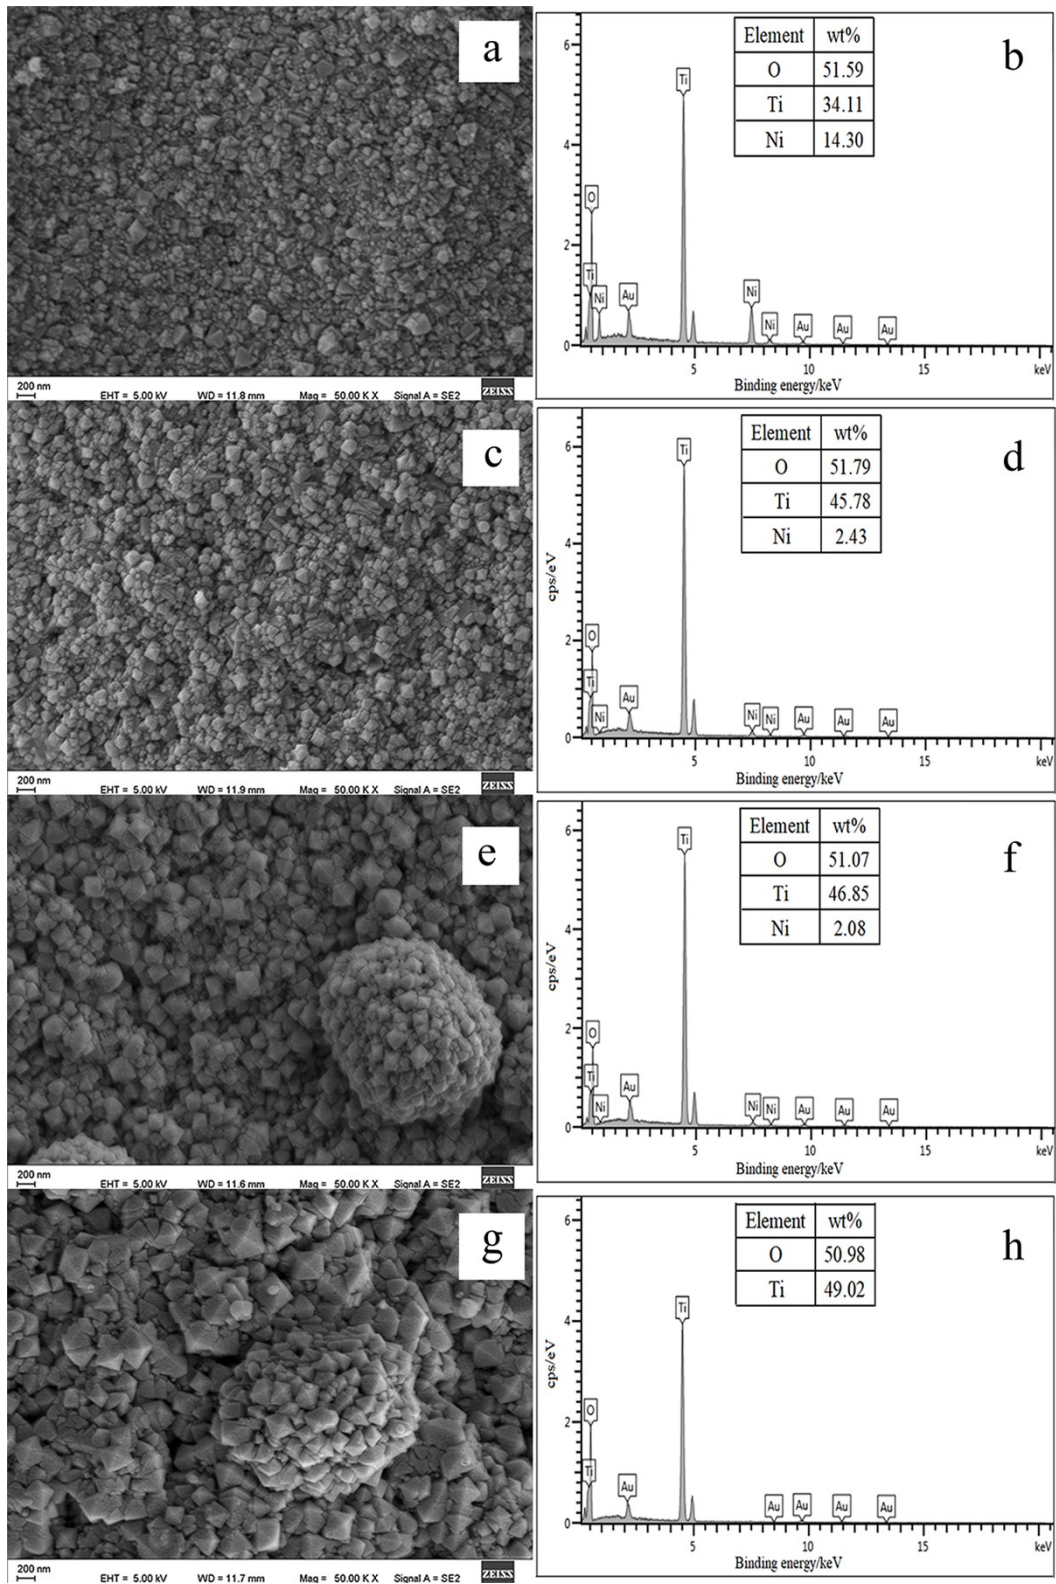

**Fig. S2.** SEM images and EDX spectra of the oxide coatings grown on the pretreated NiTi wire by hydrothermal reaction in HCl solution of 0.1 mol·L<sup>-1</sup> (a, b), 0.2 mol·L<sup>-1</sup> (c, d), 0.3 mol·L<sup>-1</sup> (e, f) and 0.4 mol·L<sup>-1</sup> (g, h) at 150 °C for 12 h.

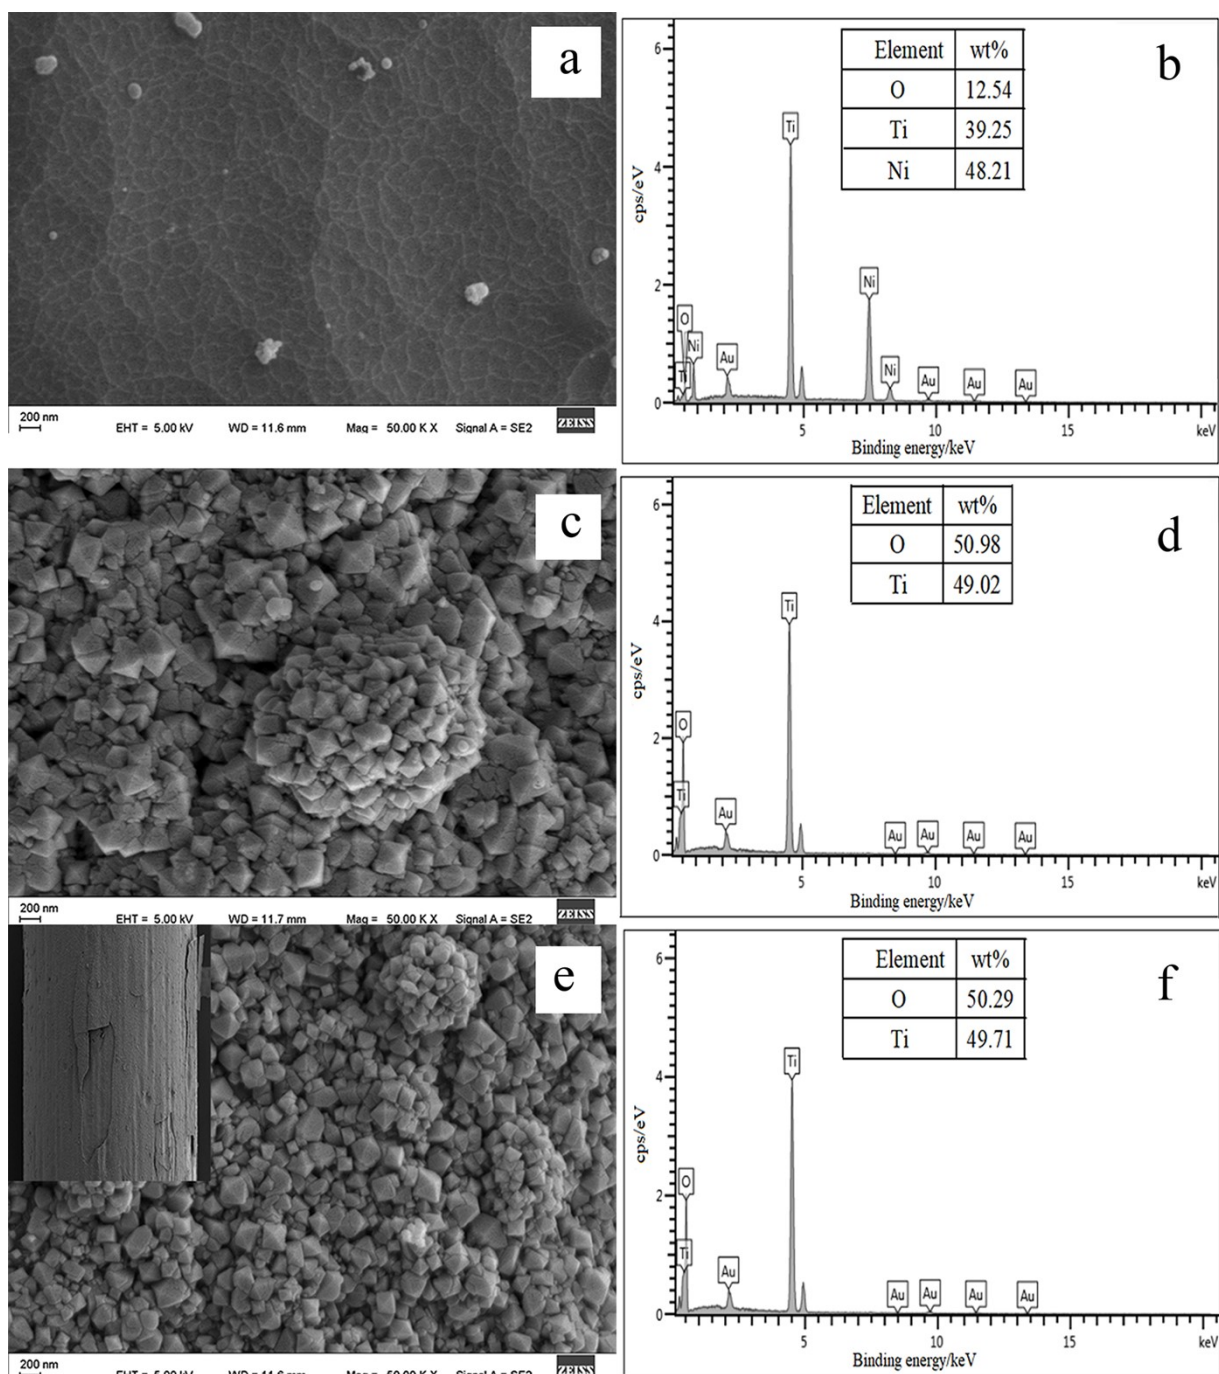

**Fig. S3.** SEM images and EDX spectra of the oxide coatings grown on the pretreated NiTi wire by hydrothermal reaction in HCl solution of  $0.4 \text{ mol}\cdot\text{L}^{-1}$  at 100 °C (a, b), 150 °C (c, d) and 200 °C (e, f) for 12 h.

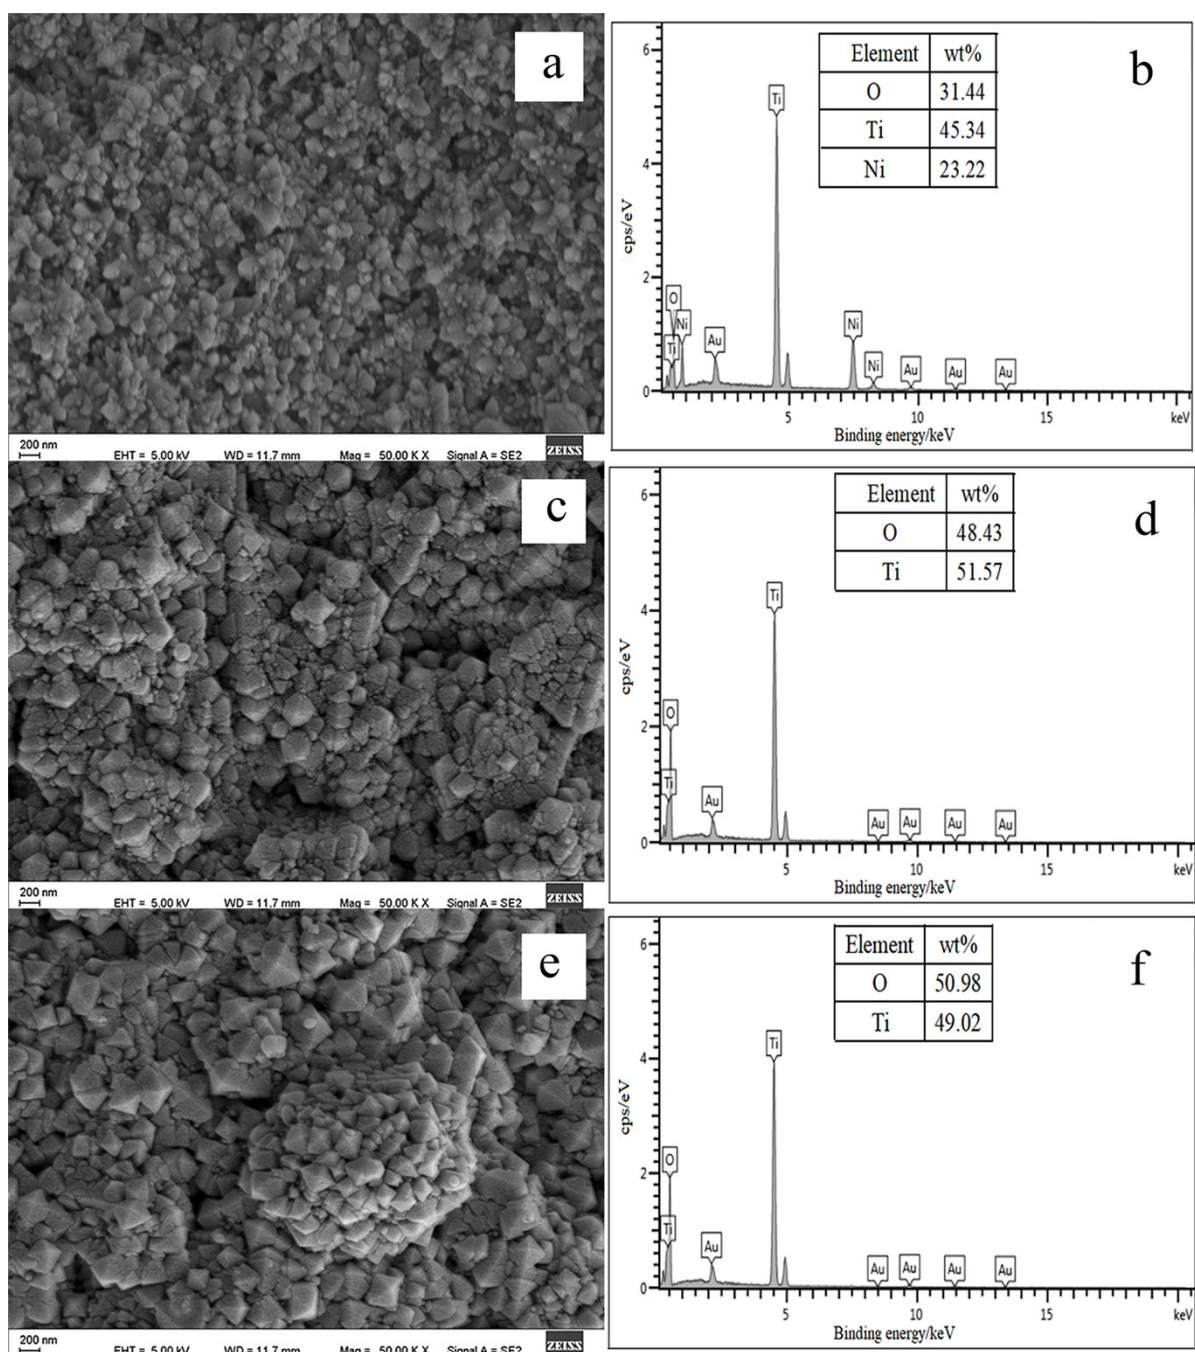

**Fig. S4.** SEM images and EDX spectra of the oxide coatings grown on the pretreated NiTi wire by hydrothermal reaction in HCl solution of  $0.4 \text{ mol}\cdot\text{L}^{-1}$  at  $150 \text{ }^\circ\text{C}$  within 3 h (a, b), 6 h (c, d) and 12 h (e, f).

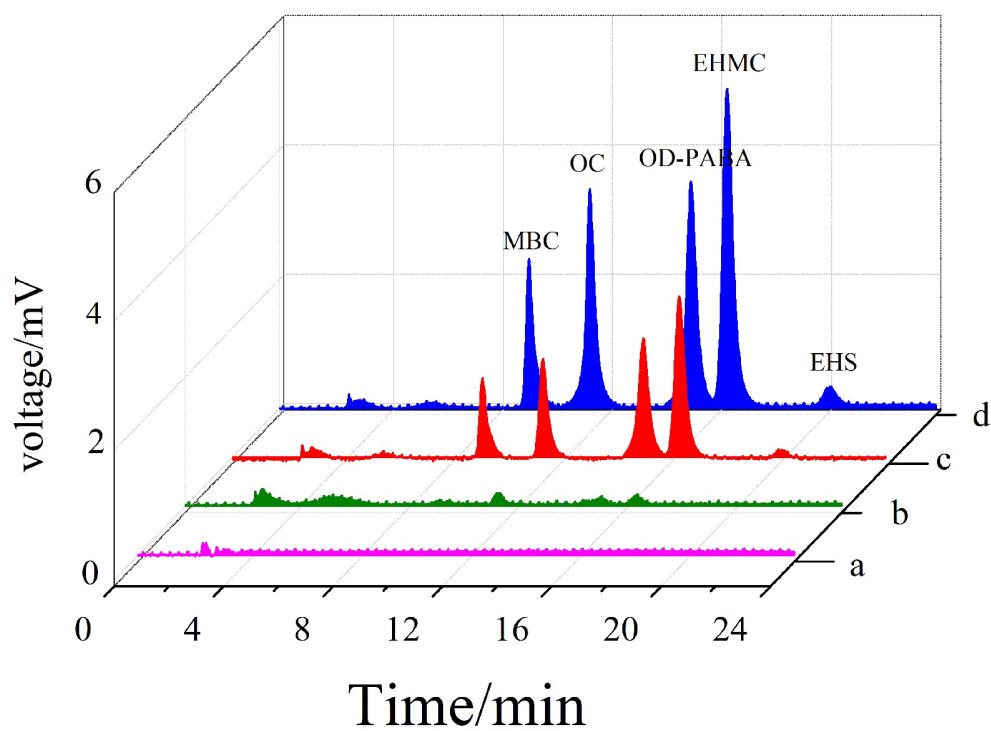

**Fig. S5.** Representative chromatograms of UVFs of direct HPLC for snow water (a), SPME-HPLC for snow water (b), and SPME-HPLC for snow water spiked at  $5.0 \mu\text{g}\cdot\text{L}^{-1}$  (c) and SPME-HPLC for snow water spiked at  $10 \mu\text{g}\cdot\text{L}^{-1}$  (d).

**Table S1**

Analytical results for the enrichment and determination of target UVFs in real water samples (n = 3)

| Samples                                        | PAHs    | Original<br>( $\mu\text{g}\cdot\text{L}^{-1}$ ) | Spiked with $5.0 \mu\text{g}\cdot\text{L}^{-1}$ |          |      | Spiked with $10.0 \mu\text{g}\cdot\text{L}^{-1}$ |          |      |
|------------------------------------------------|---------|-------------------------------------------------|-------------------------------------------------|----------|------|--------------------------------------------------|----------|------|
|                                                |         |                                                 | Detected                                        | Recovery | RSDs | Detected                                         | Recovery | RSDs |
|                                                |         |                                                 | ( $\mu\text{g}\cdot\text{L}^{-1}$ )             | (%)      | (%)  | ( $\mu\text{g}\cdot\text{L}^{-1}$ )              | (%)      | (%)  |
| Snow water                                     | MBC     | ND <sup>a</sup>                                 | 4.87                                            | 97.4     | 5.6  | 9.53                                             | 95.3     | 4.7  |
|                                                | OC      | ND                                              | 4.62                                            | 92.4     | 8.6  | 9.32                                             | 93.2     | 6.2  |
|                                                | OD-PABA | ND                                              | 4.35                                            | 87.0     | 5.5  | 10.4                                             | 104      | 5.5  |
|                                                | EHMC    | ND                                              | 5.03                                            | 101      | 4.6  | 9.05                                             | 90.5     | 6.1  |
|                                                | EHS     | ND                                              | 5.32                                            | 106      | 6.0  | 9.42                                             | 94.2     | 4.9  |
| River water<br>(Site 1)                        | MBC     | ND                                              | 3.95                                            | 79.0     | 8.0  | 10.6                                             | 106      | 8.0  |
|                                                | OC      | ND                                              | 4.74                                            | 94.8     | 4.9  | 7.62                                             | 76.2     | 6.7  |
|                                                | OD-PABA | ND                                              | 5.18                                            | 104      | 7.5  | 10.2                                             | 102      | 6.4  |
|                                                | EHMC    | ND                                              | 5.10                                            | 103      | 5.6  | 9.29                                             | 92.9     | 5.3  |
|                                                | EHS     | ND                                              | 4.13                                            | 82.6     | 5.9  | 8.25                                             | 82.5     | 4.5  |
| River water<br>(Site 2)                        | MBC     | ND                                              | 5.20                                            | 104      | 8.2  | 8.93                                             | 89.3     | 5.4  |
|                                                | OC      | ND                                              | 4.11                                            | 82.2     | 8.3  | 10.6                                             | 106      | 7.2  |
|                                                | OD-PABA | ND                                              | 4.38                                            | 87.6     | 6.7  | 8.77                                             | 87.7     | 5.2  |
|                                                | EHMC    | ND                                              | 5.48                                            | 110      | 7.1  | 9.23                                             | 92.3     | 6.5  |
|                                                | EHS     | ND                                              | 4.03                                            | 80.6     | 7.0  | 10.2                                             | 102      | 5.2  |
| River water<br>(Site 3)                        | MBC     | ND                                              | 4.34                                            | 86.8     | 5.4  | 10.6                                             | 106      | 5.6  |
|                                                | OC      | ND                                              | 4.73                                            | 94.6     | 8.0  | 9.37                                             | 93.7     | 6.3  |
|                                                | OD-PABA | ND                                              | 4.49                                            | 89.8     | 5.1  | 8.95                                             | 89.5     | 5.3  |
|                                                | EHMC    | ND                                              | 4.71                                            | 94.2     | 7.2  | 8.08                                             | 80.8     | 7.0  |
|                                                | EHS     | ND                                              | 5.09                                            | 102      | 5.9  | 9.41                                             | 94.1     | 7.2  |
| Effluent from<br>wastewater<br>treatment plant | MBC     | ND                                              | 4.18                                            | 83.6     | 5.6  | 7.81                                             | 78.1     | 6.9  |
|                                                | OC      | 0.14                                            | 3.88                                            | 74.8     | 6.9  | 7.03                                             | 68.9     | 6.3  |
|                                                | OD-PABA | 0.51                                            | 3.63                                            | 62.4     | 5.7  | 6.95                                             | 64.4     | 4.5  |
|                                                | EHMC    | 0.46                                            | 3.52                                            | 61.2     | 9.1  | 7.68                                             | 72.2     | 7.3  |
|                                                | EHS     | ND                                              | 3.14                                            | 62.8     | 7.2  | 7.79                                             | 77.9     | 8.7  |

<sup>a</sup> ND, not detected or lower than LOD.
